# Supplementary material
Source: ML conference proceedings conference paper supplement (https://proceedings.mlr.press/v89/berthet19b.html)
Supplement: Supplementary file 1 [file berthet19b-supp.pdf]

Supplementary material to  
“Detection of Planted Solutions for Flat Satisfiability Problems”

Quentin Berthet and Jordan Ellenberg

**Appendix A: Technical proofs**

**Proof** [of Lemma 2] It holds that

$$Z = \sum_{x \in \mathbb{F}_2^n} \prod_{i=1}^m \mathbf{1}\{x \notin V_j\}.$$

By linearity, symmetry of the distribution, and independence of the  $V_j$ , we have for any  $x_0 \in \mathbb{F}_2^n$

$$\mathbf{E}[Z] = 2^n (\mathbf{P}_{\text{unif}}(x_0 \notin V_1))^m.$$

Furthermore, for each  $k$ -flat of  $\mathbb{F}_2^n$ ,  $|V_1| = 2^{n-k}$ , which yields the desired result. ■

**Proof** [of Lemma 3] We derive the second moment of  $Z$

$$\begin{aligned} Z^2 &= \sum_{x, x' \in \mathbb{F}_2^n} \mathbf{1}\{x \in \mathcal{S}(V)\} \mathbf{1}\{x' \in \mathcal{S}(V)\} \\ &= \sum_x \mathbf{1}\{x \in \mathcal{S}(V)\} + \sum_{x \neq x'} \mathbf{1}\{x \in \mathcal{S}(V)\} \mathbf{1}\{x' \in \mathcal{S}(V)\}. \end{aligned}$$

Taking expectation yields

$$\mathbf{E}[Z^2] = \mathbf{E}[Z] + \sum_{x \neq x'} \mathbf{P}_{\text{unif}}(\{x \in \mathcal{S}(V)\} \cap \{x' \in \mathcal{S}(V)\}).$$

The uniform distribution is invariant under the action of the affine group  $G$ , which is doubly transitive on  $\mathbb{F}_2^n$ . Therefore, the term  $\mathbf{P}_{\text{unif}}(\{x \in \mathcal{S}(V)\} \cap \{x' \in \mathcal{S}(V)\})$  is constant for all couples of distinct elements  $(x, x')$  of  $\mathbb{F}_2^n$ . To compute this distribution, it thus suffices to consider that  $x$  and  $x'$  are uniformly randomly chosen among the set of pairs of distinct elements. For all  $j \in [m]$ , this yields

$$\mathbf{P}_{\text{unif}}(\{x \notin V_j\} \cap \{x' \notin V_j\}) = \frac{2^n - 2^{n-k}}{2^n} \cdot \frac{2^n - (2^{n-k} - 1)}{2^n - 1} = (1 - 2^{-k}) \left(1 - 2^{-k} + \frac{2 - 2^{-k}}{2^n - 1}\right).$$

Using this in the derivation of the second moment, we have

$$\begin{aligned} \mathbf{E}[Z^2] &= \mathbf{E}[Z] + (2^{2n} - 2^n)(1 - 2^{-k})^m \left(1 - 2^{-k} + \frac{2 - 2^{-k}}{2^n - 1}\right)^m \\ &\leq \mathbf{E}[Z] + 2^{2n}(1 - 2^{-k})^{2m} \left(1 + \frac{2 - 2^{-k}}{1 - 2^{-k}} \frac{1}{2^n - 1}\right)^m \\ &\leq \mathbf{E}[Z] + \mathbf{E}[Z]^2 \left(1 + \frac{2 - 2^{-k}}{1 - 2^{-k}} \frac{1}{2^n - 1}\right)^{\Delta n}. \end{aligned}$$

Note that the last term is a  $1 + o(1)$ . ■

**Proof** [of Theorem 4] We first note that  $2(1 - 2^{-k})^{\Delta k} = 1$ , so that  $\mathbf{E}[Z] = [2(1 - 2^{-k})^{\Delta}]^n$  is exponentially large when  $\Delta < \Delta_k$ , and exponentially small when  $\Delta > \Delta_k$ .

- For  $\Delta < \Delta_k$ , Markov's inequality yields

$$\mathbf{P}_{\text{unif}}(V \in \text{FLAT}) = \mathbf{P}_{\text{unif}}(Z(V) \geq 1) \leq \mathbf{E}[Z] \rightarrow 0.$$

- For  $\Delta < \Delta_k$ , Paley-Zigmund's inequality and the result of Lemma 3 yields

$$\mathbf{P}_{\text{unif}}(V \in \text{FLAT}) = \mathbf{P}_{\text{unif}}(Z(V) > 0) \geq \frac{\mathbf{E}[Z]^2}{\mathbf{E}[Z^2]} \rightarrow 1.$$

■

**Proof** [of Lemma 5] By definition of  $\mathbf{P}_{\text{planted}}$

$$\frac{\mathbf{P}_{\text{planted}}(V)}{\mathbf{P}_{\text{unif}}(V)} = \frac{1}{2^n} \sum_{x \in \mathbb{F}_2^n} \frac{\mathbf{P}_{x^*}(V)}{\mathbf{P}_{\text{unif}}(V)}.$$

To compute the probabilities in the above ratios, we use the interpretation above of  $m$  drawings in  $N = 2^k \mathcal{N}_k$  possible flats independently if the distribution is  $\mathbf{P}_{\text{unif}}$ , or otherwise in  $N^* = (2^k - 1) \mathcal{N}_k$  possible choices corresponding to flats that do not contain  $x^*$ . Therefore, it holds for all  $V$

$$\frac{\mathbf{P}_{x^*}(V)}{\mathbf{P}_{\text{unif}}(V)} = \begin{cases} 0 & \text{if } x \notin \mathcal{S}(V) \\ \left(\frac{N}{N^*}\right)^m & \text{otherwise} \end{cases}$$

Therefore, the likelihood ratio can be expressed in terms of  $\mathbf{1}\{x \in \mathcal{S}(V)\}$ , and  $N/N^* = 1/(1 - 2^{-k})$

$$\begin{aligned} \frac{\mathbf{P}_{\text{planted}}}{\mathbf{P}_{\text{unif}}}(V) &= \frac{1}{2^n} \sum_{x \in \mathbb{F}_2^n} \left(\frac{N}{N^*}\right)^m \mathbf{1}\{x \in \mathcal{S}(V)\} \\ &= \frac{1}{\mathbf{E}[Z]} \sum_{x \in \mathbb{F}_2^n} \mathbf{1}\{x \in \mathcal{S}(V)\} = \frac{Z(V)}{\mathbf{E}[Z]}. \end{aligned}$$

■

**Proof** [of Lemma 8] Consider a fixed  $Z \in \mathbb{F}_2^{N^k}$  such that  $Z_\emptyset = 1$ . For an  $k$ -flat  $W$  described by  $(\ell, \alpha)$ , we write  $\mathcal{L}_{\alpha, \ell}(Z)$  as a function  $q_{Z, \ell}$  of  $\alpha \in \mathbb{F}_2^k$

$$q_{Z, \ell}(\alpha) = \sum_{\substack{S \subseteq [n] \\ |S| \leq k}} c_S(\ell, \alpha) Z_S.$$

We observe that each  $c_S(\ell, \cdot)$  is a multivariate multilinear polynomial (with monomials that are squarefree), so that  $q_{Z, \ell} \in \mathbb{F}_2[\alpha_1, \dots, \alpha_k]$ . Furthermore, the coefficient of the monomial  $\alpha_1 \dots \alpha_k$  is  $Z_\emptyset = 1$ . As the squarefree monomials are linearly independent, there exists an element of  $\mathbb{F}_2^k$  such that  $q_{Z, \ell}(\alpha) \neq 0$ . Therefore, as  $\alpha$  is uniformly distributed under the uniform distribution  $q_0$ , it holds that

$$\mathbf{P}_{\text{unif}}(\mathcal{L}_{\alpha, \ell}(Z) = 0) = \mathbf{P}_{\text{unif}}(q_{Z, \ell}(\alpha) = 0) \leq 1 - 2^{-k}.$$

As an aside, note that this bound is tight. Indeed, for all  $Z \in \mathcal{V}$ , the event  $\mathcal{L}_{\alpha, \ell}(Z) = 0$  is equivalent to  $z \notin W$ , for  $z = \phi^{-1}(Z)$ . The probability of this event is  $1 - 2^{-k}$ , as seen in the proof of Lemma 2.

Let  $V = (V_1, \dots, V_m) \sim \mathbf{P}_{\text{unif}}$ . By independence, we obtain directly that

$$\mathbf{P}_{\text{unif}}(\mathcal{L}_{\ell_j, \alpha_j}(X) = 0, \forall j \in [m]) \leq (1 - 2^{-k})^m.$$

By a union bound over all elements of  $\mathbb{F}_2^{N_k}$ , it holds that

$$\mathbf{P}_{\text{unif}}(\mathcal{L}_V \text{ has a solution}) \leq 2^{N_k}(1 - 2^{-k})^m.$$

Taking  $\Delta > \Delta_k$  yields the desired result.  $\blacksquare$

**Proof** [of Lemma 10] For all  $x \in \mathbb{F}_2^n$ , we observe that under the null hypothesis, the variable  $s(x, V)$  has distribution  $\mathcal{B}(m, 1 - 2^{-k})$ . Therefore, by Hoeffding's inequality,

$$\mathbf{P}_{\text{unif}}(s(x, V) > [(1 - 2^{-k}) + \alpha]m) \leq \exp(-2\alpha^2 m).$$

A union bound on  $\mathbb{F}_2^n$  yields

$$\mathbf{P}_{\text{unif}}(\sigma(V) > [(1 - 2^{-k}) + \alpha]m) \leq 2^n \exp(-2\alpha^2 m) \leq \exp(-[2\alpha^2 \Delta - \log(2)]n).$$

Under  $\mathbf{P}_{x^*}$  the variable  $s(x^*, V)$  has distribution  $\mathcal{B}(m, (1 - 2^{-k}) + \pi 2^{-k})$ . By Hoeffding's inequality,

$$\mathbf{P}_{x^*, \pi}(s(x^*, V) < [(1 - 2^{-k}) + \pi 2^{-k} - \alpha]m) \leq \exp(-2\alpha^2 m).$$

By definition of  $\mathbf{P}_{\text{planted}, \pi}$  and  $\sigma(V) \geq s(x, V)$  for all  $x \in \mathbb{F}_2^n$ , we obtain the desired result.  $\blacksquare$

**Proof** [of Theorem 11] For  $\Delta > \tilde{\Delta}_{k, \pi}$ , taking  $\alpha = \pi 2^{-(k+1)}$  in the results of Lemma 10 yields the desired upper bound, as  $2\alpha^2 \Delta - \log(2) > 0$ .

For  $\Delta < \Delta_{k, \pi}$ , we derive a bound on the total variation distance  $d_{\text{TV}}(\mathbf{P}_{\text{unif}}, \mathbf{P}_{\text{planted}, \pi})$ , through the inequality

$$d_{\text{TV}}(\mathbf{P}_{\text{unif}}, \mathbf{P}_{\text{planted}, \pi}) = \frac{1}{2} \mathbf{E} \left[ \left| \frac{\mathbf{P}_{\text{planted}, \pi}}{\mathbf{P}_{\text{unif}}}(V) - 1 \right| \right] \leq \frac{1}{2} \sqrt{\mathbf{E} \left[ \left( \frac{\mathbf{P}_{\text{planted}, \pi}}{\mathbf{P}_{\text{unif}}}(V) - 1 \right)^2 \right]}.$$

The term inside the square root being equal to the chi-square divergence  $\chi^2(\mathbf{P}_{\text{planted}, \pi}, \mathbf{P}_{\text{unif}})$  between the two distributions. We write  $\mathbf{P}_{x, \pi} = q_{x, \pi}^{\otimes m}$  and  $\mathbf{P}_{\text{unif}} = q_0^{\otimes m}$  as products of the distribution of each independent  $V_j$ . Writing out  $\mathbf{P}_{\text{planted}, \pi}$  as a uniform mixture of the  $\mathbf{P}_{x, \pi}$  yields

$$\begin{aligned} \chi^2(\mathbf{P}_{\text{planted}, \pi}, \mathbf{P}_{\text{unif}}) &= \frac{1}{2^{2n}} \sum_{x, x' \in \mathbb{F}_2^n} \mathbf{E} \left[ \frac{\mathbf{P}_{x, \pi} \mathbf{P}_{x', \pi}}{\mathbf{P}_{\text{unif}} \mathbf{P}_{\text{unif}}}(V) \right] - 1 \\ &= \frac{1}{2^{2n}} \sum_{x, x' \in \mathbb{F}_2^n} \mathbf{E} \left[ \frac{q_{x, \pi} q_{x', \pi}}{q_0 q_0}(V_1) \right]^m - 1 \\ &= \frac{1}{2^{2n}} \sum_{x \in \mathbb{F}_2^n} \mathbf{E} \left[ \left( \frac{q_{x, \pi}}{q_0}(V_1) \right)^2 \right]^n + \frac{1}{2^{2n}} \sum_{x \neq x'} \mathbf{E} \left[ \frac{q_{x, \pi} q_{x', \pi}}{q_0 q_0}(V_1) \right]^m - 1. \end{aligned}$$

Note that  $q_{x, \pi} = (1 - \pi)q_0 + \pi q_x$ , where  $q_x$  is the uniform distribution on  $k$ -flats that do not contain  $x$  (the planting distribution), so that

$$\frac{q_{x, \pi}}{q_0} = 1 + \pi \left[ \frac{q_x}{q_0} - 1 \right].$$

Substituting this in the above yields

$$\begin{aligned} \chi^2(\mathbf{P}_{\text{planted}, \pi}, \mathbf{P}_{\text{unif}}) &= \frac{1}{2^{2n}} \sum_{x \in \mathbb{F}_2^n} \left( 1 + \pi^2 \left[ \mathbf{E} \left[ \left( \frac{q_x}{q_0}(V_1) \right)^2 \right] - 1 \right] \right)^m \\ &\quad + \frac{1}{2^{2n}} \sum_{x \neq x'} \left( 1 + \pi^2 \left[ \mathbf{E} \left[ \frac{q_x q_{x'}}{q_0 q_0}(V_1) \right] - 1 \right] \right)^m - 1. \end{aligned}$$

Furthermore, for any  $k$ -flat  $V_1$ , it holds that  $q_x/q_0(V_1) = (N/N_k)\mathbf{1}\{x \notin V_1\}$ . We give the following upper bound the last two terms of this equation's RHS,

$$\begin{aligned} \frac{1}{2^{2n}} \sum_{x \neq x'} \left(1 + \pi^2 \left[ \mathbf{E} \left[ \frac{q_x q_{x'}}{q_0 q_0} (V_1) \right] - 1 \right] \right)^m - 1 &\leq \frac{1}{2^{2n}} 2^n \left(1 - \pi^2 + \pi^2 \frac{\mathbf{P}_{\text{unif}}(x, x' \notin V_1)}{(1 - 2^{-k})^2}\right)^m - 1 \\ &\leq \left(\frac{1 - \pi^2}{2}\right)^n \left(1 + \frac{\pi^2}{1 - \pi^2} \frac{2 - 2^{-k}}{(1 - 2^{-k})^2} \frac{1}{2^n - 1}\right)^{\Delta n} - 1 \\ &\leq \left(1 + \frac{c_k \pi^2}{2^n - 1}\right)^{c_k n / \pi^2} - 1, \end{aligned}$$

for some constant  $c_k > 0$  (independent of  $n$  and  $\pi$ ), by the formula for  $\mathbf{P}_{\text{unif}}(x, x' \notin V_1)$  derived in the proof of Lemma ???. The last term converges to 0 when  $n \rightarrow +\infty$ . We bound as well the first term of the main equation's RHS

$$\begin{aligned} \frac{1}{2^{2n}} \sum_{x \in \mathbb{F}_2^n} \left(1 + \pi^2 \left[ \mathbf{E} \left[ \left(\frac{q_x}{q_0}(V_1)\right)^2 \right] - 1 \right] \right)^m &\leq \frac{1}{2^{2n}} 2^n (1 + \pi^2 (\mathbf{P}_{\text{unif}}(x \notin V_1) - 1))^m \\ &\leq \frac{1}{2^n} \left(1 + \frac{\pi^2}{2^k - 1}\right)^{\Delta n}. \end{aligned}$$

Taking  $\Delta < \Delta_{k,\pi} = 2^k \log(2)/\pi^2$  yields  $1/2(1 + \pi^2/(2^k - 1))^\Delta < 1$ , and all the terms of  $\chi^2(\mathbf{P}_{\text{planted},\pi}, \mathbf{P}_{\text{unif}})$  go to 0 when  $n \rightarrow +\infty$ . ■

**Proof** [of Lemma 12] In all cases, the  $k$ -flats are independent, and the  $m$  sets of  $k$  linear forms are uniformly distributed. If  $(A, b)$  is uniformly random, so are the  $b_j$ , and as a consequence, the  $\varepsilon_j$ . This yields the desired  $V \sim \mathbf{P}_{\text{unif}}$ . However, if there is a secret  $x$ ,  $\phi_j(x) = 1 - b_j$  with probability  $\eta$ . The distribution of  $1 - b_j - \phi_j(x)$  is therefore is a mixture of the uniform distribution on  $\mathbb{F}_2$  (with weight  $1 - \pi$ ) and of the unit mass at 1 (with weight  $\pi$ ). The distribution of  $\varepsilon_j - \ell_j(x)$  is thus the mixture of the uniform distribution on  $\mathbb{F}_2^n$  (with weight  $1 - \pi$ ) and of the the distribution on  $\mathbb{F}_2^k \setminus \{0\}$  generated by placing a 1 in one of the coefficients of  $\varepsilon_j - \ell_j(x)$ , and letting the others be independent and uniform. As shown in Remark 1, the flat  $V_j$  has distribution  $q_{x,\pi}$  and  $V \sim \mathbf{P}_{x,\pi}$ , as desired. ■
